# Supplementary material
Source: ML conference proceedings conference paper supplement (https://proceedings.mlr.press/v139/garreau21a.html)
Supplement: Supplementary file 1 [file garreau21a-supp.pdf]

# Supplementary material for the paper: “What does LIME really see in images?”

June 10, 2021

## Organization of the supplementary material

In this appendix, we present the detailed proof of our main results (Theorem 1 and Proposition 2) and additional qualitative results. We follow the proof scheme of Garreau and von Luxburg [2020]. In a nutshell, when  $\lambda = 0$ , the main problem

$$\hat{\beta}_n^\lambda \in \arg \min_{\beta \in \mathbb{R}^{d+1}} \left\{ \sum_{i=1}^n \pi_i (y_i - \beta^\top z_i)^2 + \lambda \|\beta\|^2 \right\} \quad (1)$$

reduces to least squares, with  $\hat{\beta}_n$  given in closed-form by

$$\hat{\beta}_n = (Z^\top W Z)^{-1} Z^\top W y,$$

with  $Z \in \{0, 1\}^{n \times d}$  the matrix whose lines are given by the  $z_i$ s and  $W$  the diagonal matrix such that  $W_{i,i} = \pi_i$ . Setting  $\hat{\Sigma}_n := \frac{1}{n} Z^\top W Z$  and  $\hat{\Gamma}_n := \frac{1}{n} Z^\top W y$ , the study of  $\hat{\beta}_n$  can be split in two parts: the examination of  $\hat{\Sigma}_n$  (Section 1), and then that of  $\hat{\Gamma}_n$  (Section 2). We put everything together in Section 3, proving the concentration of  $\hat{\beta}_n$  and providing the expression of  $\beta^f$ . All technical results are collected in Section 4. Finally, additional qualitative results are presented in Section 5.

## 1 Study of $\hat{\Sigma}_n$

We start by the study of  $\hat{\Sigma}_n$ , first computing its limit  $\Sigma$  when  $n \rightarrow +\infty$  (Section 1.1). We show that  $\Sigma$  is invertible in closed-form in Section 1.2. We then proceed to show that  $\hat{\Sigma}_n$  is concentrated around  $\Sigma$  in Section 1.3. We conclude this section by obtaining a control on the operator norm of  $\Sigma^{-1}$  (Section 1.4), a technical requirement for the proof of the main result.

### 1.1 Computation of $\Sigma$

By definition of  $Z$  and  $W$ , the matrix  $\hat{\Sigma}_n$  can be written

$$\hat{\Sigma}_n = \begin{pmatrix} \frac{1}{n} \sum_{i=1}^n \pi_i & \frac{1}{n} \sum_{i=1}^n \pi_i z_{i,1} & \cdots & \frac{1}{n} \sum_{i=1}^n \pi_i z_{i,d} \\ \frac{1}{n} \sum_{i=1}^n \pi_i z_{i,1} & \frac{1}{n} \sum_{i=1}^n \pi_i z_{i,1}^2 & \cdots & \frac{1}{n} \sum_{i=1}^n \pi_i z_{i,1} z_{i,d} \\ \vdots & \vdots & \ddots & \vdots \\ \frac{1}{n} \sum_{i=1}^n \pi_i z_{i,d} & \frac{1}{n} \sum_{i=1}^n \pi_i z_{i,1} z_{i,d} & \cdots & \frac{1}{n} \sum_{i=1}^n \pi_i z_{i,d}^2 \end{pmatrix} \in \mathbb{R}^{(d+1) \times (d+1)}.$$

Recall that we defined the random variable  $z$  such that  $z_i$  is i.i.d.  $z$  for any  $i$ , as well as  $\pi$  and  $x$  the associated weights and perturbed samples. For any  $p \geq 0$ , we also defined  $\alpha_p = \mathbb{E}[\pi \prod_{i=1}^p z_i]$  (Definition 1). Taking the expectation with respect to  $z$  in the previous display, we obtain

$$\Sigma_{j,k} = \begin{cases} \alpha_0 & \text{if } j = k = 0, \\ \alpha_1 & \text{if } j = 0 \text{ and } k > 0 \text{ or } j > 0 \text{ and } k = 0 \text{ or } j = k > 0, \\ \alpha_2 & \text{otherwise.} \end{cases}$$

As promised, it is possible to compute the  $\alpha$  coefficients in closed-form. Let us denote by  $S$  the number of superpixel deletions. Since the coordinates of  $z$  are i.i.d. Bernoulli with parameter  $1/2$ , we deduce that  $S$  is a *binomial* random variable of parameters  $d$  and  $1/2$ . Note that, conditionally to  $S = s$ ,  $\sum_j z_j = d - s$  and therefore  $\pi = \psi(s/d)$  with

$$\forall t \in [0, 1], \quad \psi(t) := \exp\left(\frac{-(1 - \sqrt{1-t})^2}{2\nu^2}\right) \quad (2)$$

as in the paper. As a consequence of these observations, we have:

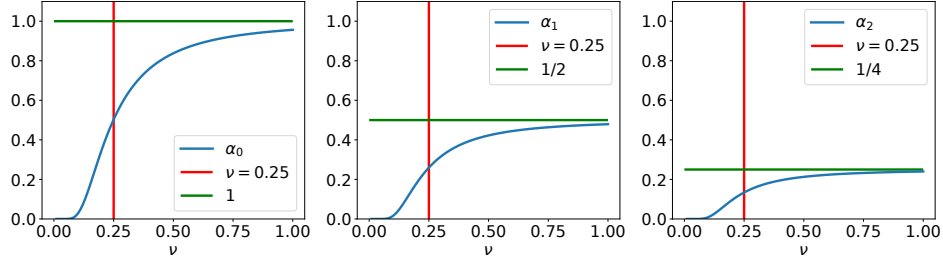

Figure 1: The first three  $\alpha$  coefficients as a function of the bandwidth  $\nu$  for  $d = 50$ . In green the limit value given by Lemma 1.

**Proposition 1 (Computation of the  $\alpha$  coefficients).** *Let  $p \geq 0$  be an integer. Then*

$$\alpha_p = \frac{1}{2^d} \sum_{s=0}^d \binom{d-p}{s} \psi(s/d).$$

*Proof.* We write

$$\begin{aligned} \alpha_p &= \mathbb{E} [\pi z_1 \cdots z_p] \\ &= \sum_{s=0}^d \mathbb{E}_s [\pi z_1 \cdots z_p] \mathbb{P}(S = s) && \text{(law of total expectation)} \\ &= \frac{1}{2^d} \sum_{s=0}^d \binom{d}{s} \mathbb{E}_s [\pi z_1 \cdots z_p | z_1 = 1, \dots, z_p = 1] \mathbb{P}_s(z_1 = 1, \dots, z_p = 1) && (S \sim \mathcal{B}(n, 1/2)) \\ &= \frac{1}{2^d} \sum_{s=0}^d \binom{d}{s} \psi(s/d) \mathbb{P}_s(z_1 = 1, \dots, z_p = 1) && \text{(definition of } \psi) \\ \alpha_p &= \frac{1}{2^d} \sum_{s=0}^d \binom{d}{s} \frac{(d-p)!}{d!} \cdot \frac{(d-s)!}{(d-s-p)!} \psi(s/d) && \text{(Lemma 3)} \end{aligned}$$

We conclude by some algebra. □

It is quite straightforward to compute the limits of the  $\alpha$  coefficients when  $\nu \rightarrow +\infty$ . In fact, since  $e^{-1/(2\nu^2)} \leq \psi(t) \leq 1$  for any  $\nu > 0$ , we have the following bounds on  $\alpha_p$ :

**Lemma 1 (Bounding the  $\alpha$  coefficients).** *For any  $p \geq 0$ , we have*

$$\frac{e^{-\frac{1}{2\nu^2}}}{2^p} \leq \alpha_p \leq \frac{1}{2^p}.$$

*In particular, when  $\nu \rightarrow +\infty$ , we have  $\alpha_p \rightarrow \frac{1}{2^p}$  for any  $p \geq 0$ .*

We demonstrate these approximations in Figure 1.

## 1.2 $\sigma$ coefficients

Since the structure of  $\Sigma$  is the same as in the text case [Mardaoui and Garreau, 2021], we can invert it similarly.

**Proposition 2 (Inverse of  $\Sigma$ ).** *For any  $d \geq 1$ , recall that we defined*

$$\begin{cases} \sigma_1 &= -\alpha_1, \\ \sigma_2 &= \frac{(d-2)\alpha_0\alpha_2 - (d-1)\alpha_1^2 + \alpha_0\alpha_1}{\alpha_1 - \alpha_2}, \\ \sigma_3 &= \frac{\alpha_1^2 - \alpha_0\alpha_2}{\alpha_1 - \alpha_2}, \end{cases}$$

*and  $c_d = (d-1)\alpha_0\alpha_2 - d\alpha_1^2 + \alpha_0\alpha_1$ . Let us further define  $\sigma_0 := (d-1)\alpha_2 + \alpha_1$ . Assume that  $c_d \neq 0$  and  $\alpha_1 \neq \alpha_2$ . Then  $\Sigma$  is invertible, and it holds that*

$$\Sigma^{-1} = \frac{1}{c_d} \begin{pmatrix} \sigma_0 & \sigma_1 & \sigma_1 & \cdots & \sigma_1 \\ \sigma_1 & \sigma_2 & \sigma_3 & \cdots & \sigma_3 \\ \sigma_1 & \sigma_3 & \sigma_2 & \ddots & \vdots \\ \vdots & \vdots & \ddots & \ddots & \sigma_3 \\ \sigma_1 & \sigma_3 & \cdots & \sigma_3 & \sigma_2 \end{pmatrix} \in \mathbb{R}^{(d+1) \times (d+1)}. \quad (3)$$

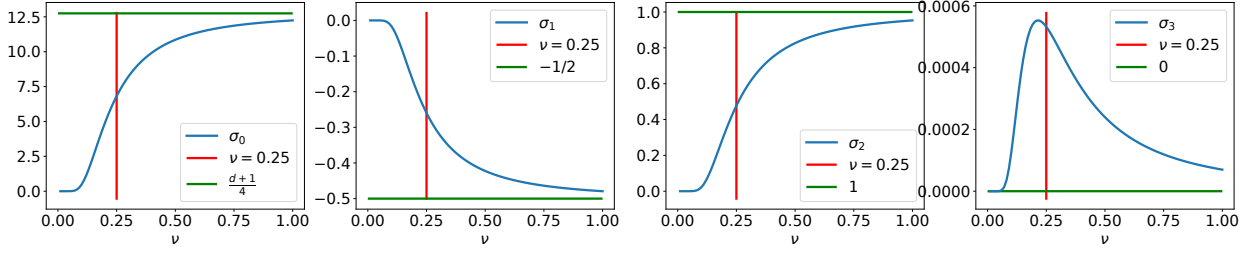

Figure 2: The first four  $\sigma$  coefficients as a function of the bandwidth  $\nu$  for  $d = 50$ . In green, the limit values given by Eq. (4).

From Lemma 1, we deduce

$$\sigma_0 \rightarrow \frac{d+1}{4}, \quad \sigma_1 \rightarrow \frac{-1}{2}, \quad \sigma_2 \rightarrow 1, \quad \sigma_3 \rightarrow 0, \quad \text{and} \quad c_d \rightarrow 1/4. \quad (4)$$

when  $\nu \rightarrow +\infty$ . We illustrate this in Figure 2. Now, Proposition 2 requires  $\alpha_1 \neq \alpha_2$  and  $c_d \neq 0$  in order for  $\Sigma$  to be invertible. One of the consequences of the following result is that these conditions are always satisfied.

**Proposition 3 ( $\Sigma$  is invertible).** *Let  $d \geq 1$  and  $\nu > 0$ . Then  $\alpha_1 - \alpha_2 \geq e^{-\frac{1}{2\nu^2}}/4$  and  $c_d \geq e^{-\frac{1}{2\nu^2}}/4$ .*

Note that in this case the lower bound obtained on  $c_d$  is tight. We show the evolution of  $c_d$  with respect to the bandwidth in Figure 3.

*Proof.* By definition of the  $\alpha$  coefficients and Pascal identity, it holds that

$$\alpha_p - \alpha_{p+1} = \frac{1}{2^d} \sum_{s=0}^d \binom{d-p-1}{s-1} \psi\left(\frac{s}{d}\right), \quad (5)$$

for any  $p \geq 0$ . Since  $e^{-1/(2\nu^2)} \leq \psi(t) \leq 1$  for any  $1 \leq t \leq d$ , we deduce from Eq. (5) that, for any  $p \geq 0$ ,

$$\frac{e^{-\frac{1}{2\nu^2}}}{2^{p+1}} \leq \alpha_p - \alpha_{p+1} \leq \frac{1}{2^{p+1}}. \quad (6)$$

We deduce the lower bound on  $\alpha_1 - \alpha_2$  by setting  $p = 1$  in the previous display.

Let us turn to  $c_d$ . We write

$$\begin{aligned} c_d &= d\alpha_1(\alpha_0 - \alpha_1) - (d-1)\alpha_0(\alpha_1 - \alpha_2) \\ &= \frac{1}{4^d} \left[ d \cdot \sum_{s=0}^d \binom{d-1}{s} \psi\left(\frac{s}{d}\right) \cdot \sum_{s=0}^d \binom{d-1}{s-1} \psi\left(\frac{s}{d}\right) - (d-1) \cdot \sum_{s=0}^d \binom{d}{s} \psi\left(\frac{s}{d}\right) \cdot \sum_{s=0}^d \binom{d-2}{s-1} \psi\left(\frac{s}{d}\right) \right] \\ &\quad \text{(using Eq. (5))} \end{aligned}$$

$$c_d = \frac{1}{4^d} \left[ \sum_{s=0}^d \binom{d-1}{s} \psi\left(\frac{s}{d}\right) \cdot \sum_{s=0}^d s \binom{d}{s} \psi\left(\frac{s}{d}\right) - \sum_{s=0}^d \binom{d}{s} \psi\left(\frac{s}{d}\right) \cdot \sum_{s=0}^d s \binom{d-1}{s} \psi\left(\frac{s}{d}\right) \right],$$

where we used elementary properties of the binomial coefficients in the last display. For any  $0 \leq s \leq d$ , let us set

$$A_s := \binom{d-1}{s} \sqrt{\psi\left(\frac{s}{d}\right)}, \quad B_s := s \sqrt{\psi\left(\frac{s}{d}\right)}, \quad C_s := \sqrt{\psi\left(\frac{s}{d}\right)}, \quad \text{and} \quad D_s := \binom{d}{s} \sqrt{\psi\left(\frac{s}{d}\right)}.$$

With these notation,

$$c_d = \frac{1}{4^d} \left[ \sum_s A_s C_s \cdot \sum_s B_s D_s - \sum_s A_s B_s \cdot \sum_s C_s D_s \right].$$

According to the four-letter identity (Proposition 13), we can rewrite  $c_d$  as

$$\begin{aligned} c_d &= \frac{1}{4^d} \sum_{s < t} (A_s D_t - A_t D_s)(C_s B_t - C_t B_s) \\ &= \frac{1}{4^d} \sum_{s < t} (t-s) \left( \binom{d-1}{s} \binom{d}{t} - \binom{d-1}{t} \binom{d}{s} \right) \psi\left(\frac{s}{d}\right) \psi\left(\frac{t}{d}\right) \\ c_d &= \frac{1}{d \cdot 4^d} \sum_{s < t} \binom{d}{s} \binom{d}{t} (s-t)^2 \psi\left(\frac{s}{d}\right) \psi\left(\frac{t}{d}\right). \end{aligned}$$

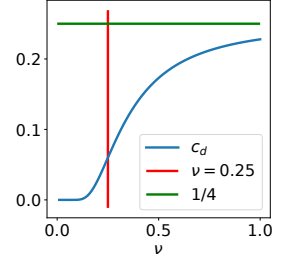

Figure 3: Evolution of  $c_d$  with respect to  $\nu$  when  $d = 50$ .

Since  $e^{-1/(2\nu^2)} \leq \psi(t) \leq 1$  for any  $1 \leq t \leq 1$ , all that is left to do is to control the double sum. According to Proposition 14, we have

$$\sum_{s < t} \binom{d}{s} \binom{d}{t} (s-t)^2 = d \cdot 4^{d-1}.$$

We deduce that

$$\frac{e^{-\frac{1}{2\nu^2}}}{4} \leq c_d \leq \frac{1}{4}. \quad (7)$$

□

We conclude this section with useful relationships between  $\alpha$  and  $\sigma$  coefficients.

**Proposition 4 (Useful equalities).** *Let  $\alpha_p$ ,  $\sigma_p$ , and  $c_d$  be defined as above. Then it holds that*

$$\sigma_0\alpha_1 + \sigma_1\alpha_1 + (d-1)\sigma_1\alpha_2 = 0, \quad (8)$$

$$\sigma_1\alpha_1 + \sigma_2\alpha_1 + (d-1)\sigma_3\alpha_2 = c_d, \quad (9)$$

$$\sigma_1\alpha_1 + \sigma_2\alpha_2 + \sigma_3\alpha_1 + (d-2)\sigma_3\alpha_2 = 0, \quad (10)$$

$$\sigma_1\alpha_0 + \sigma_2\alpha_1 + (d-1)\sigma_3\alpha_1 = 0, \quad (11)$$

$$\sigma_0\alpha_0 + d\sigma_1\alpha_1 = c_d. \quad (12)$$

*Proof.* Straightforward from the definitions. □

### 1.3 Concentration of $\hat{\Sigma}_n$

We now turn to the concentration of  $\hat{\Sigma}_n$  around  $\Sigma$ . More precisely, we show that  $\hat{\Sigma}_n$  is close to  $\Sigma$  in operator norm, with high probability. Since the definition of  $\hat{\Sigma}_n$  is identical to the one in the Tabular LIME case, we can use the proof machinery of Garreau and von Luxburg [2020].

**Proposition 5 (Concentration of  $\hat{\Sigma}_n$ ).** *For any  $t \geq 0$ ,*

$$\mathbb{P}\left(\left\|\hat{\Sigma}_n - \Sigma\right\|_{\text{op}} \geq t\right) \leq 4d \cdot \exp\left(\frac{-nt^2}{32d^2}\right).$$

*Proof.* We can write  $\hat{\Sigma} = \frac{1}{n} \sum_i \pi_i Z_i Z_i^\top$ . The summands are bounded i.i.d. random variables, thus we can apply the matrix version of Hoeffding inequality. More precisely, the entries of  $\hat{\Sigma}_n$  belong to  $[0, 1]$  by construction, and Lemma 1 guarantees that the entries of  $\Sigma$  also belong to  $[0, 1]$ . Therefore, if we set  $M_i := \frac{1}{n} \pi_i Z_i Z_i^\top - \Sigma$ , then the  $M_i$  satisfy the assumptions of Theorem 21 in Garreau and von Luxburg [2020] and we can conclude since  $\frac{1}{n} \sum_i M_i = \hat{\Sigma}_n - \Sigma$ . □

### 1.4 Control of $\|\Sigma^{-1}\|_{\text{op}}$

In this section, we obtain a control on the operator norm of the inverse covariance matrix. Our strategy is to bound the norm of the  $\sigma$  coefficients. We start with the control of  $\alpha_1^2 - \alpha_0\alpha_2$ , a quantity appearing in  $\sigma_2$  and  $\sigma_3$ .

**Lemma 2 (Control of  $\alpha_1^2 - \alpha_0\alpha_2$ ).** *For any  $d \geq 2$ , we have*

$$|\alpha_1^2 - \alpha_0\alpha_2| \leq \frac{1}{2d}.$$

*Proof.* By definition of the  $\alpha$  coefficients, we know that

$$\alpha_1^2 - \alpha_0\alpha_2 = \frac{1}{4d} \left[ \left( \sum_{s=0}^d \binom{d-1}{s} \psi\left(\frac{s}{d}\right) \right)^2 - \left( \sum_{s=0}^d \binom{d}{s} \psi\left(\frac{s}{d}\right) \right) \cdot \left( \sum_{s=0}^d \binom{d-2}{s} \psi\left(\frac{s}{d}\right) \right) \right].$$

Let us ignore the  $1/4d$  normalization for now, and set  $w_s := \binom{d}{s} \psi\left(\frac{s}{d}\right)$ . Elementary manipulations of the binomial coefficients allow us to rewrite the previous display as

$$\left( \sum_{s=0}^d \frac{d-s}{d} w_s \right)^2 - \left( \sum_{s=0}^d w_s \right) \cdot \left( \sum_{s=0}^d \frac{d-s}{d} \cdot \frac{d-s-1}{d-1} w_s \right). \quad (13)$$

Let us notice that

$$\frac{d-s}{d} - \frac{d-s-1}{d-1} = \frac{s}{d(d-1)}.$$

Thus we can split Eq. (13) in two parts.

The first part is reminiscent of the Cauchy-Schwarz-like expression that appears in the proof of Proposition 3:

$$\left( \sum_{s=0}^d \frac{d-s}{d} w_s \right)^2 - \left( \sum_{s=0}^d w_s \right) \cdot \left( \sum_{s=0}^d \frac{(d-s)^2}{d^2} w_s \right). \quad (14)$$

We use, again, the four letter identity (Proposition 13) to bound this term. Namely, for any  $0 \leq s \leq d$ , let us set

$$A_s = B_s := \frac{d-s}{d} \sqrt{w_s}, \quad \text{and} \quad C_s = D_s := \sqrt{w_s}.$$

Then we can rewrite Eq. (14) as

$$\sum_{s < t} (A_s D_t - A_t D_s)(C_s B_t - C_t B_s) = \frac{-1}{d^2} \sum_{s < t} (t-s)^2 \binom{d}{s} \binom{d}{t} \psi\left(\frac{s}{d}\right) \psi\left(\frac{t}{d}\right). \quad (15)$$

According to Proposition 14, Eq. (15) is bounded by  $d \cdot 4^{d-1}/d^2 = 4^{d-1}/d$ .

The second part of Eq. (13) reads

$$\left( \sum_{s=0}^d w_s \right) \cdot \left( \sum_{s=0}^d \frac{d-s}{d} \cdot \frac{s}{d(d-1)} w_s \right).$$

Since  $\psi$  is bounded by 1, coming back to the definition of the  $w_s$ , it is straightforward to show that  $|\sum_s w_s| \leq 2^d$  and that  $|\sum_s s(d-s)w_s| \leq d(d-1)2^{d-2}$ . We deduce that (the absolute value of) this second term is upper bounded by  $4^{d-1}/d$ .

Putting together the bounds obtained on both terms and renormalizing by  $4^d$ , we obtain that

$$|\alpha_1^2 - \alpha_0 \alpha_2| \leq \frac{1}{4^d} \left[ \frac{4^{d-1}}{d} + \frac{4^{d-1}}{d} \right] = \frac{1}{2d}.$$

□

We now have everything we need to provide reasonably tight upper bounds for the  $\sigma$  coefficients.

**Proposition 6 (Bounding the  $\sigma$  coefficients).** *Let  $d \geq 2$ . Then the following holds:*

$$|\sigma_0| \leq \frac{3d}{4}, \quad |\sigma_1| \leq \frac{1}{2}, \quad |\sigma_2| \leq 2e^{\frac{1}{2\nu^2}}, \quad \text{and} \quad |\sigma_3| \leq \frac{2e^{\frac{1}{2\nu^2}}}{d}.$$

*Proof.* From Lemma 1 and the definition of  $\sigma_0$ , we have

$$|\sigma_0| = |(d-1)\alpha_2 + \alpha_1| \leq \frac{d-1}{4} + \frac{1}{2} = \frac{d+3}{4}.$$

We deduce the first result since  $d \geq 2$ . Next, since  $\sigma_1 = -\alpha_1$ , we obtain  $|\sigma_1| \leq 1/2$  directly from Lemma 1. Regarding the last two coefficients, recall that Proposition 3 guarantees that their common denominator  $\alpha_1 - \alpha_2$  is lower bounded by  $e^{\frac{-1}{2\nu^2}}/4$ . Since

$$(d-2)\alpha_0\alpha_2 - (d-1)\alpha_1^2 + \alpha_0\alpha_1 = c_d + \alpha_1^2 - \alpha_0\alpha_2,$$

we can write  $\sigma_2 = (c_d + \alpha_1^2 - \alpha_0\alpha_2)/(\alpha_1 - \alpha_2)$  and deduce that

$$|\sigma_2| \leq \frac{1/4 + 1/(2d)}{e^{\frac{-1}{2\nu^2}}/4} \leq 2e^{\frac{1}{2\nu^2}},$$

since, according to Eq. (7),  $c_d \leq 1/4$  and  $\alpha_1^2 - \alpha_0\alpha_2 \leq 1/(2d)$  according to Lemma 2. Finally, we write

$$|\sigma_3| = \left| \frac{\alpha_1^2 - \alpha_0\alpha_2}{\alpha_1 - \alpha_2} \right| \leq \frac{1/(2d)}{e^{\frac{-1}{2\nu^2}}/4} = \frac{2e^{\frac{1}{2\nu^2}}}{d}.$$

□

The bounds obtained in Proposition 6 immediately translate into a control of the Frobenius norm of  $\Sigma^{-1}$ , which in turn yields a control over the operator norm of  $\Sigma^{-1}$ , as promised.

**Corollary 1 (Control of  $\|\Sigma^{-1}\|_{\text{op}}$ ).** *Let  $d \geq 2$ . Then  $\|\Sigma^{-1}\|_{\text{op}} \leq 8de^{\frac{1}{2\nu^2}}$ .*

*Proof.* Using Proposition 6, we write

$$\begin{aligned} \|\Sigma^{-1}\|_{\text{F}}^2 &= \frac{1}{c_d^2} [\sigma_0^2 + 2d\sigma_1^2 + d\sigma_2^2 + (d^2 - d)\sigma_3^2] \\ &\leq 16e^{\frac{1}{\nu^2}} \left[ \frac{9d^2}{16} + \frac{2d}{4} + 4de^{\frac{1}{\nu^2}} + 4e^{\frac{1}{\nu^2}} \right] \\ &\leq 61d^2e^{\frac{2}{\nu^2}}, \end{aligned}$$

where we used  $d \geq 2$  in the last display. Since the operator norm is upper bounded by the Frobenius norm, we conclude observing that  $\sqrt{61} \leq 8$ .  $\square$

**Remark 1.** The bound on  $\|\Sigma^{-1}\|_{\text{op}}$  is essentially tight with respect to the dependency in  $d$ , as can be seen in Figure 4.

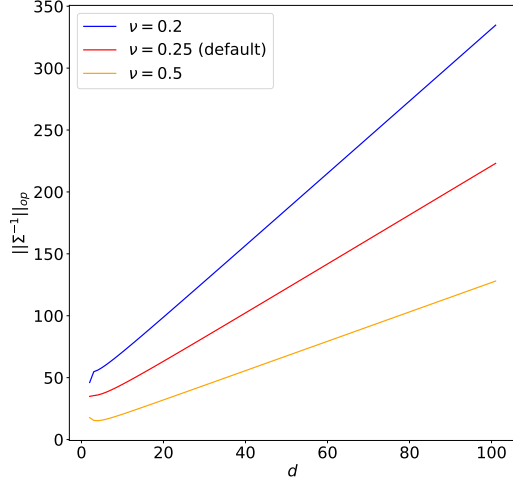

Figure 4: Evolution of  $\|\Sigma^{-1}\|_{\text{op}}$  as a function of  $d$  for various values of the bandwidth parameter. The linear dependency in  $d$  is striking.

## 2 Study of $\hat{\Gamma}_n$

We now turn to the study of  $\hat{\Gamma}_n$ . We start by computing the limiting expression. Recall that we defined  $\hat{\Gamma}_n = \frac{1}{n} Z^T W y$ , where  $y \in \mathbb{R}^{d+1}$  is the random vector defined coordinate-wise by  $y_i = f(x_i)$ . From the definition of  $\hat{\Gamma}_n$ , it is straightforward that

$$\hat{\Gamma}_n = \begin{pmatrix} \frac{1}{n} \sum_{i=1}^n \pi_i f(x_i) \\ \frac{1}{n} \sum_{i=1}^n \pi_i z_{i,1} f(x_i) \\ \vdots \\ \frac{1}{n} \sum_{i=1}^n \pi_i z_{i,d} f(x_i) \end{pmatrix} \in \mathbb{R}^{d+1}.$$

As a consequence, if we define  $\Gamma^f := \mathbb{E}[\hat{\Gamma}_n]$ , it holds that

$$\Gamma^f = \begin{pmatrix} \mathbb{E}[\pi f(x)] \\ \mathbb{E}[\pi z_1 f(x)] \\ \vdots \\ \mathbb{E}[\pi z_d f(x)] \end{pmatrix}. \quad (16)$$

We specialize Eq. (16) to shape detectors in Section 2.1 and linear models in Section 2.2. The concentration of  $\hat{\Gamma}_n$  around  $\Gamma$  is obtained in Section 2.3.

### 2.1 Shape detectors

Recall that we defined

$$\forall x \in [0, 1]^D, \quad f(x) = \prod_{u \in \mathcal{S}} \mathbf{1}_{x_u > \tau}, \quad (17)$$

with  $\mathcal{S} = \{u_1, \dots, u_q\}$  a fixed set of pixels indices and  $\tau \in (0, 1)$  a threshold. As in the paper, let us define  $E = \{j \text{ s.t. } J_j \cap \mathcal{S} \neq \emptyset\}$  denote the set of superpixels intersecting the shape, and

$$E_+ = \{j \in E \text{ s.t. } \bar{\xi}_j > \tau\} \quad \text{and} \quad E_- = \{j \in E \text{ s.t. } \bar{\xi}_j \leq \tau\}.$$

We also defined

$$\mathcal{S}_+ = \{u \in \mathcal{S} \text{ s.t. } \xi_u > \tau\} \quad \text{and} \quad \mathcal{S}_- = \{u \in \mathcal{S} \text{ s.t. } \xi_u \leq \tau\}.$$

In the main paper, we made the following simplifying assumption:

$$\forall j \in E_+, \quad J_j \cap \mathcal{S}_- = \emptyset. \quad (18)$$

This is not the case here. Unfortunately, without this assumption, the expression of  $\Gamma^f$  is slightly more complicated and we need to generalize the definition of the  $\alpha$  coefficients.

**Definition 1 (Generalized  $\alpha$  coefficients).** For any  $p, q$  such that  $p + q \leq d$ , we define

$$\alpha_{p,q} := \mathbb{E} [\pi z_1 \cdots z_p \cdot (1 - z_{p+1}) \cdots (1 - z_{p+q})]. \quad (19)$$

We notice that, for any  $1 \leq p \leq d$ ,  $\alpha_{p,0} = \alpha_p$ . As it is the case with  $\alpha$  coefficients, the generalized  $\alpha$  coefficients can be computed in closed-form:

**Proposition 7 (Computation of the generalized  $\alpha$  coefficients).** Let  $p, q$  such that  $p + q \leq d$ . Then

$$\alpha_{p,q} = \frac{1}{2^d} \sum_{s=0}^d \binom{d-p-q}{s-q} \psi\left(\frac{s}{d}\right).$$

*Proof.* We follow the proof of Proposition 1.

$$\begin{aligned} \alpha_{p,q} &= \mathbb{E} [\pi z_1 \cdots z_p \cdot (1 - z_{p+1}) \cdots (1 - z_{p+q})] \\ &= \sum_{s=0}^d \mathbb{E}_s [\pi z_1 \cdots z_p \cdot (1 - z_{p+1}) \cdots (1 - z_{p+q})] \cdot \mathbb{P}(S = s) \\ &= \frac{1}{2^d} \sum_{s=0}^d \binom{d}{s} \psi\left(\frac{s}{d}\right) \mathbb{P}_s(z_1 = \cdots = z_p = 1, z_{p+1} = \cdots = z_{p+q} = 0) \\ &= \frac{1}{2^d} \sum_{s=0}^d \binom{d}{s} \psi\left(\frac{s}{d}\right) \binom{d-p-q}{s-q} \binom{d}{s} \quad (\text{Lemma 4}) \\ \alpha_{p,q} &= \frac{1}{2^d} \sum_{s=0}^d \binom{d-p-q}{s-q} \psi\left(\frac{s}{d}\right). \end{aligned}$$

□

Notice that the expression of  $\alpha_{p,q}$  coincide with that of  $\alpha_p$  when  $q = 0$ . We can now give the expression of  $\Gamma^f$  for an elementary shape detector in the general case.

**Proposition 8 (Computation of  $\Gamma^f$ , elementary shape detector).** Assume that  $f$  is written as in Eq. (17). Assume that for any  $j \in E_-$ ,  $J_j \cap \mathcal{S}_- = \emptyset$  (otherwise  $\Gamma^f = 0$ ). Let  $p := |E_-|$  and  $q := |\{j \in E_+, J_j \cap \mathcal{S}_- \neq \emptyset\}|$ . Then  $\mathbb{E}[\pi f(x)] = \alpha_{p,q}$  and

$$\mathbb{E}[\pi z_j f(x)] = \begin{cases} 0 & \text{if } j \in \{j \in E_+ \text{ s.t. } J_j \cap \mathcal{S}_- \neq \emptyset\}, \\ \alpha_{p,q} & \text{if } j \in E_-, \\ \alpha_{p+1,q} & \text{otherwise.} \end{cases}$$

Taking  $q = 0$  (a consequence of Eq. (18)) in Proposition 8 directly yields  $\mathbb{E}[\pi f(x)] = \alpha_p$  and

$$\mathbb{E}[\pi z_j f(x)] = \begin{cases} \alpha_p & \text{if } j \in E_-, \\ \alpha_{p+1} & \text{otherwise.} \end{cases}$$

*Proof.* We notice that, for any  $u \in J_j$ ,

$$x_u = z_j \xi_u + (1 - z_j) \bar{\xi}_u.$$

There are four cases to consider when deciding whether  $x_u > \tau$  or not:

- $\xi_u > \tau$  and  $\bar{\xi}_u > \tau$ , that is,  $j \in E_+$  and  $u \in J_j \cap \mathcal{S}_+$ . Then  $x_u > \tau$  a.s.;
- $\xi_u \leq \tau$  and  $\bar{\xi}_u > \tau$ , that is,  $j \in E_+$  and  $u \in J_j \cap \mathcal{S}_-$ . Then  $x_u > \tau$  if, and only if,  $z_j = 0$ ;
- $\xi_u > \tau$  and  $\bar{\xi}_u \leq \tau$ , that is,  $j \in E_-$  and  $u \in J_j \cap \mathcal{S}_+$ . Then  $x_u > \tau$  if, and only if,  $z_j = 1$ ;

- $\xi_u \leq \tau$  and  $\bar{\xi}_u \leq \tau$ , that is,  $j \in E_-$  and  $u \in J_j \cap \mathcal{S}_-$ . Then  $x_u \leq \tau$  a.s., but this last case cannot happen since we assume that for any  $j \in E_-$ ,  $J_j \cap \mathcal{S}_- = \emptyset$ .

This case separation allows us to rewrite  $f(x)$  as

$$\begin{aligned} f(x) &= \prod_{u \in \mathcal{S}} \mathbf{1}_{x_u > \tau} & (\text{Eq. (17)}) \\ &= \prod_{j \in E_+} \prod_{u \in J_j \cap \mathcal{S}_-} (1 - z_j) \cdot \prod_{j \in E_-} \prod_{u \in J_j \cap \mathcal{S}_+} z_j \end{aligned}$$

Since we assumed that for any  $j \in E_-$ ,  $J_j \cap \mathcal{S}_- = \emptyset$ , then for any  $j \in E_-$ ,  $J_j \cap \mathcal{S}_+ \neq \emptyset$ . Thus the rightmost inner products are never empty, and since  $z_j \in \{0, 1\}$  a.s., we deduce that there are  $p$  terms in the rightmost product. By definition of  $q$ , and again since  $1 - z_j \in \{0, 1\}$  a.s., there are  $q$  terms in the leftmost product. By definition of  $E_+$  and  $E_-$ , these products do not have any common terms. We deduce that  $\mathbb{E}[\pi f(x)] = \alpha_{p,q}$  by definition of the generalized  $\alpha$  coefficients.

When computing  $\mathbb{E}[\pi z_j f(x)]$ , there are several possibilities. First, if  $j \in \{j \in E_+ \text{ s.t. } J_j \cap \mathcal{S}_- \neq \emptyset\}$ , since  $z_j(1 - z_j) = 0$  a.s., we deduce that  $\mathbb{E}[\pi z_j f(x)] = 0$ . Second, if  $j \in E_-$ , since  $z_j^2 = z_j$ , we recover  $\mathbb{E}[\pi z_j f(x)] = \mathbb{E}[\pi f(x)] = \alpha_{p,q}$ . Finally, if  $j$  does not belong to one of these sets, then the rightmost product gains one additional term and we obtain  $\alpha_{p+1,q}$ .  $\square$

## 2.2 Linear model

In this section, we compute  $\Gamma^f$  for a linear  $f$ . As in the paper, we define

$$f(x) = \sum_{u=1}^D \lambda_u x_u, \quad (20)$$

with  $\lambda_1, \dots, \lambda_D \in \mathbb{R}$  arbitrary coefficients. By linearity, we just have to look into the case  $f : x \mapsto x_u$  where  $u \in \{1, \dots, D\}$  is a fixed pixel index.

**Proposition 9 (Computation of  $\Gamma^f$ , linear case).** *Assume that  $f$  is defined as in Eq. (20) and  $u \in J_j$ . Then*

$$\begin{aligned} \mathbb{E}[\pi x_u] &= \alpha_1(\xi_u - \bar{\xi}_u) + \alpha_0 \bar{\xi}_u, \\ \mathbb{E}[\pi z_j x_u] &= \alpha_1(\xi_u - \bar{\xi}_u) + \alpha_1 \bar{\xi}_u, \end{aligned}$$

and, for any  $k \neq j$ ,

$$\mathbb{E}[\pi z_k x_u] = \alpha_2(\xi_u - \bar{\xi}_u) + \alpha_1 \bar{\xi}_u.$$

*Proof.* As in the proof of Proposition 8, we notice that

$$x_u = z_j \xi_u + (1 - z_j) \bar{\xi}_u.$$

Then we write

$$\begin{aligned} \mathbb{E}[\pi x_u] &= \mathbb{E}[\pi(z_j \xi_u + (1 - z_j) \bar{\xi}_u)] \\ &= \mathbb{E}[\pi z_j(\xi_u - \bar{\xi}_u) + \pi \bar{\xi}_u] \\ \mathbb{E}[\pi x_u] &= \alpha_1(\xi_u - \bar{\xi}_u) + \alpha_0 \bar{\xi}_u, \end{aligned}$$

where we used the definition of the  $\alpha$  coefficients. Now let us compute  $\mathbb{E}[\pi z_j f(x)]$ :

$$\begin{aligned} \mathbb{E}[\pi z_j x_u] &= \mathbb{E}[\pi z_j(z_j \xi_u + (1 - z_j) \bar{\xi}_u)] \\ &= \mathbb{E}[\pi z_j((\xi_u - \bar{\xi}_u) z_j + \bar{\xi}_u)] & (z_j \in \{0, 1\} \text{ a.s.}) \\ \mathbb{E}[\pi z_j x_u] &= \alpha_1(\xi_u - \bar{\xi}_u) + \alpha_1 \bar{\xi}_u. \end{aligned}$$

And finally, for any  $k \neq j$ ,

$$\begin{aligned} \mathbb{E}[\pi z_k x_u] &= \mathbb{E}[\pi z_k((\xi_u - \bar{\xi}_u) z_j + \bar{\xi}_u)] \\ &= \alpha_2(\xi_u - \bar{\xi}_u) + \alpha_1 \bar{\xi}_u. \end{aligned}$$

$\square$



### 2.3 Concentration of $\hat{\Gamma}_n$

We now show that  $\hat{\Gamma}_n$  is concentrated around  $\Gamma^f$ . Since the expression of  $\hat{\Gamma}_n$  is the same than in the tabular case, and we assume that  $f$  is bounded on the support of  $x$ , the same reasoning as in the proof of Proposition 24 in Garreau and von Luxburg [2020] can be applied.

**Proposition 10 (Concentration of  $\hat{\Gamma}_n$ ).** *Assume that  $f$  is bounded by  $M > 0$  on  $\text{Supp}(x)$ . Then, for any  $t > 0$ , it holds that*

$$\mathbb{P}\left(\|\hat{\Gamma}_n - \Gamma^f\| \geq t\right) \leq 4d \exp\left(\frac{-nt^2}{32Md^2}\right).$$

*Proof.* Since  $f$  is bounded by  $M$  on  $\text{Supp}(x)$ , it holds that  $|f(x)| \leq M$  almost surely. We can then proceed as in the proof of Proposition 24 in Garreau and von Luxburg [2020].  $\square$

## 3 The study of $\beta^f$

### 3.1 Concentration of $\hat{\beta}_n$

In this section we show the concentration of  $\hat{\beta}_n$  (Theorem 1 in the paper). The proof scheme follows closely that of Garreau and von Luxburg [2020].

**Theorem 1 (Concentration of  $\hat{\beta}_n$ ).** *Assume that  $f$  is bounded by a constant  $M$  on the unit cube  $[0, 1]^D$ . Let  $\epsilon > 0$  and  $\eta \in (0, 1)$ . Let  $d$  be the number of superpixels used by LIME. Then, there exists  $\beta^f \in \mathbb{R}^{d+1}$  such that, for every*

$$n \geq \left\lceil \max\left(2^{15}d^4e^{\frac{2}{\nu^2}}, \frac{2^{21}d^7 \max(M, M^2)e^{\frac{4}{\nu^2}}}{\epsilon^2}\right) \log \frac{8d}{\eta} \right\rceil,$$

we have  $\mathbb{P}(\|\hat{\beta}_n - \beta^f\| \geq \epsilon) \leq \eta$ .

*Proof.* As in Garreau and von Luxburg [2020], the key idea of the proof is to notice that

$$\|\hat{\beta}_n - \beta^f\| \leq 2\|\Sigma^{-1}\|_{\text{op}}\|\hat{\Gamma} - \Gamma^f\| + 2\|\Sigma^{-1}\|_{\text{op}}^2\|\Gamma^f\|\|\hat{\Sigma} - \Sigma\|_{\text{op}}, \quad (21)$$

provided that (i)  $\|\Sigma^{-1}(\hat{\Sigma} - \Sigma)\|_{\text{op}} \leq 0.32$  (this is Lemma 27 in Garreau and von Luxburg [2020]). We are going to build an event of probability at least  $1 - \eta$  such that  $\hat{\Sigma}_n$  is close to  $\Sigma$  and  $\hat{\Gamma}_n$  is close from  $\Gamma^f$ . The deterministic bound obtained on  $\|\Sigma^{-1}\|_{\text{op}}$  together with the boundedness of  $f$  will allow us to show that (ii)  $\|\Sigma^{-1}\|_{\text{op}}\|\hat{\Gamma} - \Gamma^f\| \leq \epsilon/4$  and (iii)  $\|\Sigma^{-1}\|_{\text{op}}^2\|\Gamma^f\|\|\hat{\Sigma} - \Sigma\|_{\text{op}} \leq \epsilon/4$ .

We first show (i). Let us set  $n_1 := \left\lceil 2^{15}d^4e^{\frac{2}{\nu^2}} \log \frac{8d}{\eta} \right\rceil$  and  $t_1 := \frac{1}{25de^{\frac{1}{\nu^2}}}$ . According to Proposition 5, for any  $n \geq n_1$ ,

$$\mathbb{P}\left(\|\hat{\Sigma}_n - \Sigma\|_{\text{op}} \geq t_1\right) \leq 4d \cdot \exp\left(\frac{-n_1 t_1^2}{32d^2}\right) \leq \frac{\eta}{2}.$$

Moreover, we know that  $\|\Sigma^{-1}\|_{\text{op}} \leq 8de^{\frac{1}{\nu^2}}$  (Corollary 1). Since the operator norm is sub-multiplicative, with probability greater than  $1 - \eta/2$ , we have

$$\|\Sigma^{-1}(\hat{\Sigma}_n - \Sigma)\|_{\text{op}} \leq \|\Sigma^{-1}\|_{\text{op}} \cdot \|\hat{\Sigma}_n - \Sigma\|_{\text{op}} \leq 8de^{\frac{1}{\nu^2}} \cdot t_1 = 0.32.$$

Now let us show (ii). Let us define  $n_2 := \left\lceil \frac{2^{15}Md^4e^{\frac{2}{\nu^2}}}{\epsilon^2} \log \frac{8d}{\eta} \right\rceil$  and  $t_2 := \frac{\epsilon}{32de^{\frac{1}{\nu^2}}}$ . According to Proposition 10, for any  $n \geq n_2$ , we have

$$\mathbb{P}\left(\|\hat{\Gamma}_n - \Gamma^f\| \geq t_2\right) \leq 4d \cdot \exp\left(\frac{-n_2 t_2^2}{32Md^2}\right) \leq \frac{\eta}{2}.$$

Recall that  $\|\Sigma^{-1}\|_{\text{op}} \leq 8de^{\frac{1}{\nu^2}}$  (Corollary 1): with probability higher than  $1 - \eta/2$ ,

$$\|\Sigma^{-1}\|_{\text{op}} \cdot \|\hat{\Gamma}_n - \Gamma^f\| \leq 8de^{\frac{1}{\nu^2}} \cdot t_2 = \frac{\epsilon}{4}.$$

Finally let us show (iii). Let us define  $n_3 := \left\lceil \frac{2^{21}d^7M^2e^{\frac{4}{\nu^2}}}{\epsilon^2} \log \frac{8d}{\eta} \right\rceil$  and  $t_3 := \frac{\epsilon}{2^8Md^{5/2}e^{\frac{2}{\nu^2}}}$ . According to Proposition 5, for any  $n \geq n_3$ , we have

$$\mathbb{P}\left(\|\hat{\Sigma}_n - \Sigma\|_{\text{op}} \geq t_3\right) \leq 4d \cdot \exp\left(\frac{-n_3 t_3^2}{32d^2}\right) \leq \frac{\eta}{2}.$$

Since  $f$  is bounded by  $M$ , it is straightforward to show that  $\|\hat{\Gamma}^f\| \leq M \cdot d^{1/2}$ . Moreover, recall that  $\|\Sigma^{-1}\|_{\text{op}}^2 \leq 64d^2 e^{\frac{2}{v^2}}$ . We deduce that, with probability at least  $\eta/2$ ,

$$\|\Sigma^{-1}\|_{\text{op}}^2 \cdot \|\Gamma^f\| \cdot \left\| \hat{\Sigma}_n - \Sigma \right\|_{\text{op}} \leq 64d^2 e^{\frac{2}{v^2}} \cdot M d^{1/2} \cdot t_3 = \frac{\epsilon}{4}.$$

Finally, we notice that both  $n_2$  and  $n_3$  are smaller than

$$n_4 := \left\lceil \frac{2^{21} d^7 \max(M, M^2) e^{\frac{4}{v^2}}}{\epsilon^2} \log \frac{8d}{\eta} \right\rceil.$$

Thus (ii) and (ii) simultaneously happen on an event of probability greater than  $\eta/2$  when  $n$  is larger than  $n_4$ . We conclude by a union bound argument.  $\square$

**Remark 2.** In view of Remark 1, it seems difficult to improve much the rate of convergence given by Theorem 1 with the current proof technology. Indeed, a careful inspection of the proof reveals that, starting from Eq. (21), the control of  $\|\Sigma^{-1}\|_{\text{op}}$  is key. Since the dependency in  $d$  seems tight, there is not much hope for improvement.

### 3.2 General expression of $\beta^f$

We are now able to recover Proposition 2 of the paper: the expression of  $\beta^f$  is obtained simply by multiplying Eq. (3) and (16). We also give the value of the intercept ( $\beta_0$  with our notation), which is omitted in the paper for simplicity's sake.

**Corollary 2 (Computation of  $\beta^f$ ).** *Under the assumptions of Theorem 1.*

$$\beta_0^f = c_d^{-1} \left\{ \sigma_0 \mathbb{E}[\pi f(x)] + \sigma_1 \sum_{j=1}^d \mathbb{E}[\pi z_j f(x)] \right\}, \quad (22)$$

and, for any  $1 \leq j \leq d$ ,

$$\beta_j^f = c_d^{-1} \left\{ \sigma_1 \mathbb{E}[\pi f(x)] + \sigma_2 \mathbb{E}[\pi z_j f(x)] + \sigma_3 \sum_{\substack{k=1 \\ k \neq j}}^d \mathbb{E}[\pi z_k f(x)] \right\}. \quad (23)$$

### 3.3 Shape detectors

We now specialize Corollary 2 to the case of elementary shape detectors.

**Proposition 11 (Expression of  $\beta^f$ , shape detector).** *Let  $f$  be written as in Eq. (17). Assume that for any  $j \in E_-$ ,  $J_j \cap \mathcal{S}_- = \emptyset$  (otherwise  $\beta^f = 0$ ). Let  $p$  and  $q$  as before. Then*

$$\beta_0^f = c_d^{-1} \{ \sigma_0 \alpha_{p,q} + p \sigma_1 \alpha_{p,q} + (d - p - q) \alpha_{p+1,q} \},$$

for any  $j \in E_-$ ,

$$\beta_j^f = c_d^{-1} \{ \sigma_1 \alpha_{p,q} + \sigma_2 \alpha_{p,q} + (p - 1) \sigma_2 \alpha_{p,q} + (d - p - q) \sigma_3 \alpha_{p+1,q} \},$$

for any  $j \in E_+$  such that  $J_j \cap \mathcal{S}_- \neq \emptyset$ ,

$$\beta_j^f = c_d^{-1} \{ \sigma_1 \alpha_{p,q} + p \sigma_3 \alpha_{p,q} + (d - p - q) \alpha_{p+1,q} \},$$

and

$$\beta_j^f = c_d^{-1} \{ \sigma_1 \alpha_{p,q} + \sigma_2 \alpha_{p+1,q} + p \sigma_3 \alpha_{p,q} + (d - p - q - 1) \sigma_3 \alpha_{p+1,q} \}$$

otherwise.

*Proof.* Straightforward from Corollary 2 and Proposition 8.  $\square$

Note that taking  $q = 0$  in Proposition 11 yields Proposition 3 of the paper.

### 3.4 Linear models

We deduce from Proposition 9 the expression of  $\beta^f$  for linear models. Let us define  $M_j$  the binary mask associated to superpixel  $J_j$  and let  $\circ$  be the termwise product.

**Proposition 12 (Computation of  $\beta^f$ , linear case).** *Assume that  $f$  is defined as in Eq. (20). Then*

$$\beta_0^f = \sum_{u=1}^D \lambda_u \bar{\xi}_u = f(\bar{\xi}),$$

and, for any  $1 \leq j \leq d$ ,

$$\beta_j^f = \sum_{u \in J_j} \lambda_u (\xi_u - \bar{\xi}_u) = f(M_j \circ (\xi - \bar{\xi})).$$

It is interesting to compute prediction of the surrogate model at  $\xi$ :

$$\beta_0^f + \beta_1^f + \dots + \beta_d^f = f(\bar{\xi}) + f(M_1 \circ (\xi - \bar{\xi})) + \dots + f(M_d \circ (\xi - \bar{\xi})) = f(\xi).$$

Thus in the case of linear models, the limit explanation is faithful.

*Proof.* By linearity, we can start by computing  $\beta^f$  for the function  $x \mapsto x_u$ . Assume that  $j \in \{1, \dots, d\}$  is such that  $u \in J_j$ . According to Corollary 2 and Proposition 9,

$$\begin{aligned} \beta_0^f &= \frac{1}{c_d} \left\{ \sigma_0 \mathbb{E}[\pi f(x)] + \sigma_1 \sum_{j=1}^d \mathbb{E}[\pi z_j f(x)] \right\} \\ &= \frac{1}{c_d} \left\{ \sigma_0 (\alpha_1 (\xi_u - \bar{\xi}_u) + \alpha_0 \bar{\xi}_u) + \sigma_1 (\alpha_1 (\xi_u - \bar{\xi}_u) + \alpha_1 \bar{\xi}_u) + (d-1) \sigma_1 (\alpha_2 (\xi_u - \bar{\xi}_u) + \alpha_1 \bar{\xi}_u) \right\} \\ &= \frac{1}{c_d} \left\{ (\sigma_0 \alpha_1 + \sigma_1 \alpha_1 + (d-1) \sigma_1 \alpha_2) (\xi_u - \bar{\xi}_u) + (\sigma_0 \alpha_0 + d \sigma_1 \alpha_1) \bar{\xi}_u \right\} \\ \beta_0^f &= \bar{\xi}_u, \end{aligned}$$

where we used Eqs. (8) and (12) in the last display.

$$\begin{aligned} \beta_j^f &= \frac{1}{c_d} \left\{ \sigma_1 \mathbb{E}[\pi f(x)] + \sigma_2 \mathbb{E}[\pi z_j f(x)] + \sigma_3 \sum_{\substack{k=1 \\ k \neq j}}^d \mathbb{E}[\pi z_k f(x)] \right\} \\ &= \frac{1}{c_d} \left\{ \sigma_1 (\alpha_1 (\xi_u - \bar{\xi}_u) + \alpha_0 \bar{\xi}_u) + \sigma_2 (\alpha_1 (\xi_u - \bar{\xi}_u) + \alpha_1 \bar{\xi}_u) + (d-1) \sigma_3 (\alpha_2 (\xi_u - \bar{\xi}_u) + \alpha_1 \bar{\xi}_u) \right\} \\ &= \frac{1}{c_d} \left\{ (\sigma_1 \alpha_1 + \sigma_2 \alpha_1 + (d-1) \sigma_3 \alpha_2) (\xi_u - \bar{\xi}_u) + (\sigma_1 \alpha_0 + \sigma_2 \alpha_1 + (d-1) \sigma_3 \alpha_1) \bar{\xi}_u \right\} \\ \beta_j^f &= \xi_u - \bar{\xi}_u, \end{aligned}$$

where we used Eqs. (9) and (11) in the last display. Finally, let  $k \neq j$ :

$$\begin{aligned} \beta_k^f &= \frac{1}{c_d} \left\{ \sigma_1 \mathbb{E}[\pi f(x)] + \sigma_2 \mathbb{E}[\pi z_k f(x)] + \sigma_3 \sum_{\substack{k'=1 \\ k' \neq j, k}}^d \mathbb{E}[\pi z_{k'} f(x)] \right\} \\ &= \frac{1}{c_d} \left\{ \sigma_1 (\alpha_1 (\xi_u - \bar{\xi}_u) + \alpha_0 \bar{\xi}_u) + \sigma_2 (\alpha_2 (\xi_u - \bar{\xi}_u) + \alpha_1 \bar{\xi}_u) + \sigma_3 (\alpha_1 (\xi_u - \bar{\xi}_u) + \alpha_1 \bar{\xi}_u) \right. \\ &\quad \left. + (d-2) \sigma_3 (\alpha_2 (\xi_u - \bar{\xi}_u) + \alpha_1 \bar{\xi}_u) \right\} \\ &= \frac{1}{c_d} \left\{ (\sigma_1 \alpha_1 + \sigma_2 \alpha_2 + \sigma_3 \alpha_1 + (d-2) \sigma_3 \alpha_2) (\xi_u - \bar{\xi}_u) + (\sigma_1 \alpha_0 + \sigma_2 \alpha_1 + (d-1) \sigma_3 \alpha_1) \bar{\xi}_u \right\} \\ \beta_k^f &= 0, \end{aligned}$$

where we used Eqs. (10) and (11) in the last display. We deduce the result by linearity.  $\square$

## 4 Technical results

### 4.1 Probability computations

In this section we collect all elementary probability computations necessary for the computation of the  $\alpha$  coefficients and the generalized  $\alpha$  coefficients.

**Lemma 3 (Activated only).** *Let  $p \geq 0$  be an integer. Then*

$$\mathbb{P}_s(z_1 = 1, \dots, z_p = 1) = \frac{(d-p)!}{d!} \cdot \frac{(d-s)!}{(d-s-p)!}.$$

*Proof.* Conditionally to  $S = s$ , the choice of  $S$  is uniform among all subsets of  $\{1, \dots, d\}$ . Therefore we recover the proof of Lemma 4 in Mardaoui and Garreau [2021].  $\square$

The following lemma is a slight generalization, which coincides when  $q = 0$ .

**Lemma 4 (Activated and deactivated).** *Let  $p, q$  be integers. Then*

$$\mathbb{P}_s(z_1 = \dots = z_p = 1, z_{p+1} = \dots = z_{p+q} = 0) = \binom{d-p-q}{s-q} \binom{d}{s}^{-1}.$$

*Proof.* Conditionally to  $S = s$ , the deletions are uniformly distributed. Therefore, the total number of cases is  $\binom{d}{s}$ . Now, the favorable cases correspond to superpixels  $p+1, \dots, p+q$  deleted: these are  $q$  fixed deletions. We also need to have superpixels  $1, \dots, p$  activated, these are  $p$  indices that are not available to deletions. In total, we need to place  $s-q$  deletions among  $d-p-q$  possibilities. We deduce the result.  $\square$

## 4.2 Algebraic identities

In this section we collect some identities used throughout the proofs.

**Proposition 13 (Four letter identity).** *Let  $A, B, C$ , and  $D$  be four finite sequences of real numbers. Then it holds that*

$$\sum_j A_j C_j \cdot \sum_j B_j D_j - \sum_j A_j B_j \cdot \sum_j C_j D_j = \sum_{j < k} (A_j D_k - A_k D_j)(C_j B_k - C_k B_j).$$

*Proof.* See the proof of Exercise 3.7 in Steele [2004].  $\square$

**Proposition 14 (A combinatorial identity).** *Let  $d \geq 1$  be an integer. Then*

$$V_d := \sum_{j < k} \binom{d}{j} \binom{d}{k} (j-k)^2 = d \cdot 4^{d-1}.$$

*Proof.* We first notice that

$$\begin{aligned} V_d &= \frac{1}{2} \sum_{j,k} \binom{d}{j} \binom{d}{k} (j-k)^2 && \text{(by symmetry)} \\ &= \sum_{j,k} \binom{d}{j} \binom{d}{k} k^2 - \sum_{j,k} \binom{d}{j} \binom{d}{k} jk && \text{(developing the square)} \\ &= \sum_j \binom{d}{j} \sum_k \binom{d}{k} k^2 - \left( \sum_j \binom{d}{j} j \right)^2. \end{aligned}$$

It is straightforward to show that

$$\sum_j \binom{d}{j} = 2^d, \sum_j \binom{d}{j} j = d \cdot 2^{d-1}, \text{ and } \sum_j \binom{d}{j} j^2 = d(d+1) \cdot 2^{d-2}.$$

We deduce that

$$c_d = 2^d \cdot d(d+1) \cdot 2^{d-2} - d^2 \cdot 2^{2d-2} = d \cdot 4^{d-1}.$$

$\square$

## 5 Additional results

In this section, we present additional qualitative results on the three pre-trained models used in the paper: MobileNetV2 [Sandler et al., 2018], DenseNet121 [Huang et al., 2017], and InceptionV3 [Szegedy et al., 2016].

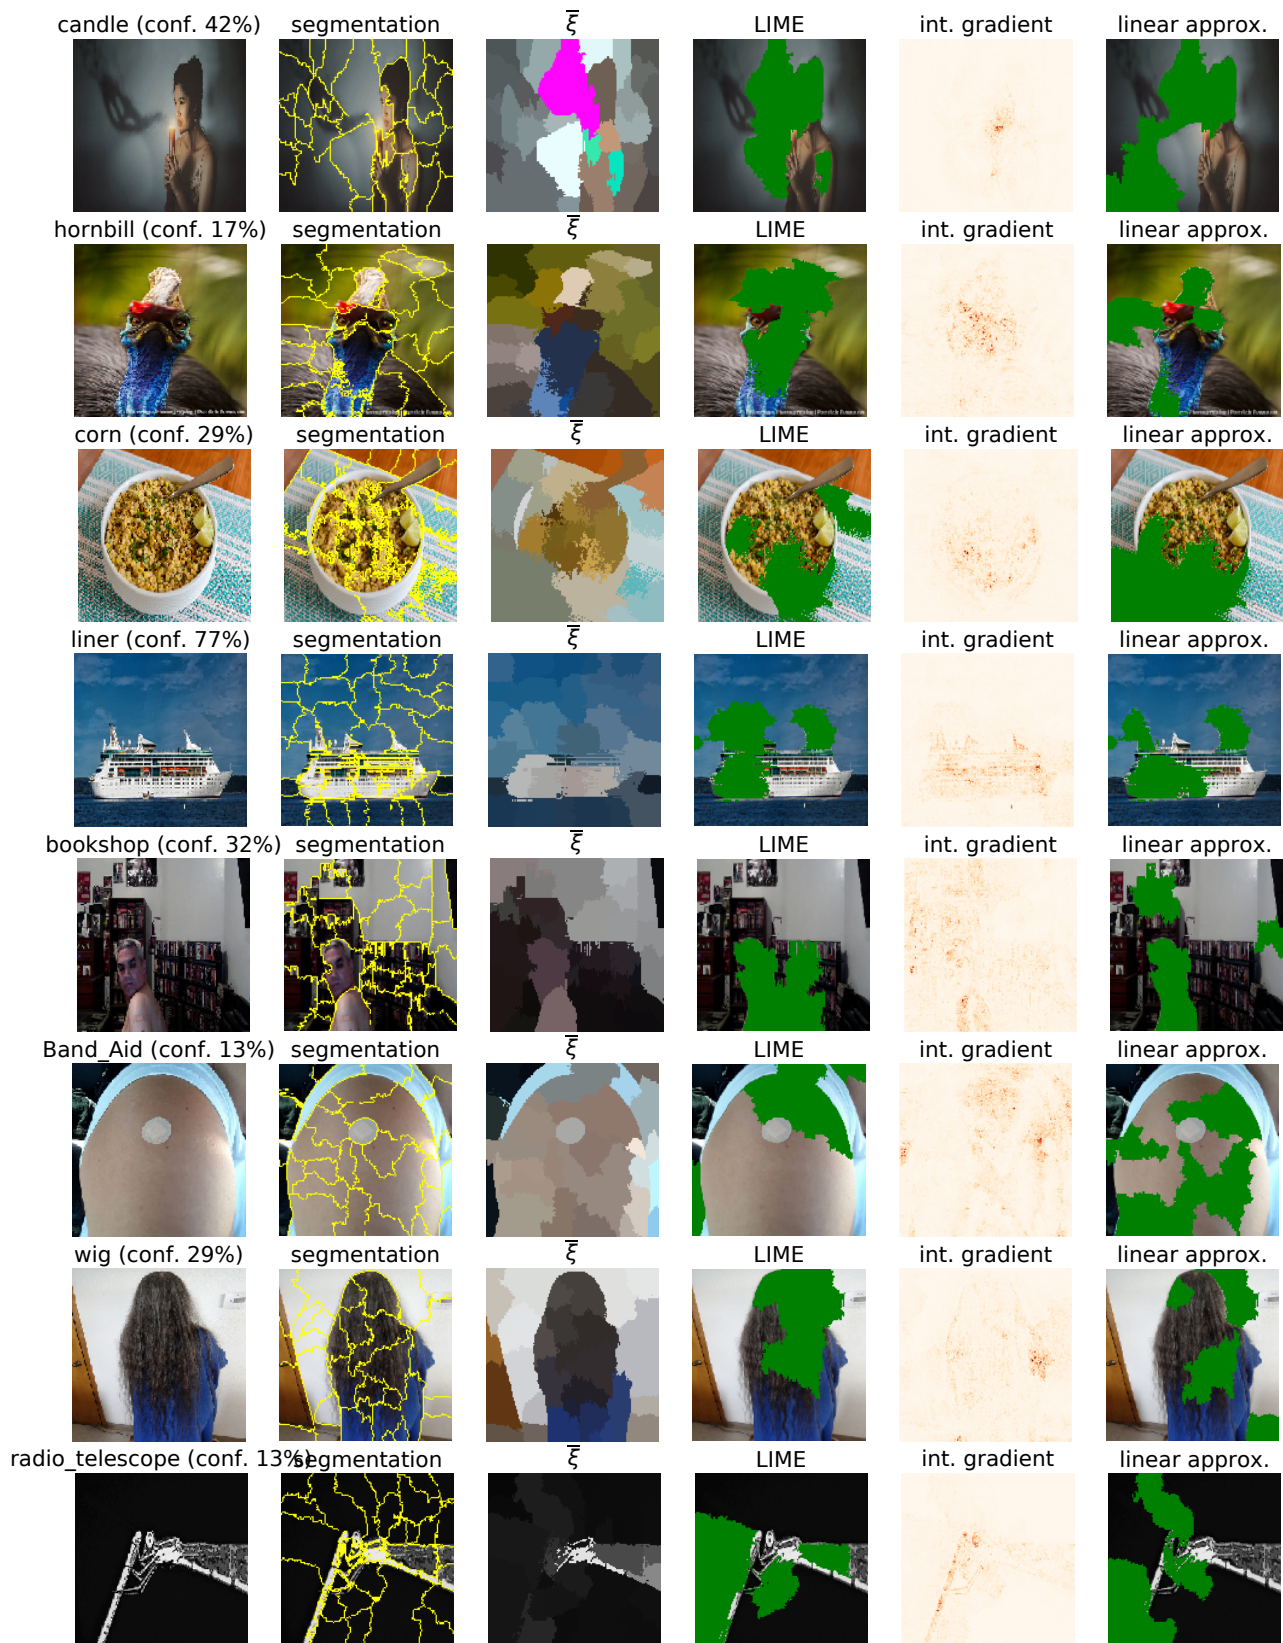

Figure 5: Empirical explanations, integrated gradient, and approximated explanations for images from the ILSVRC2017 dataset. The model explained is the likelihood function associated to the top class given by MobileNetV2.

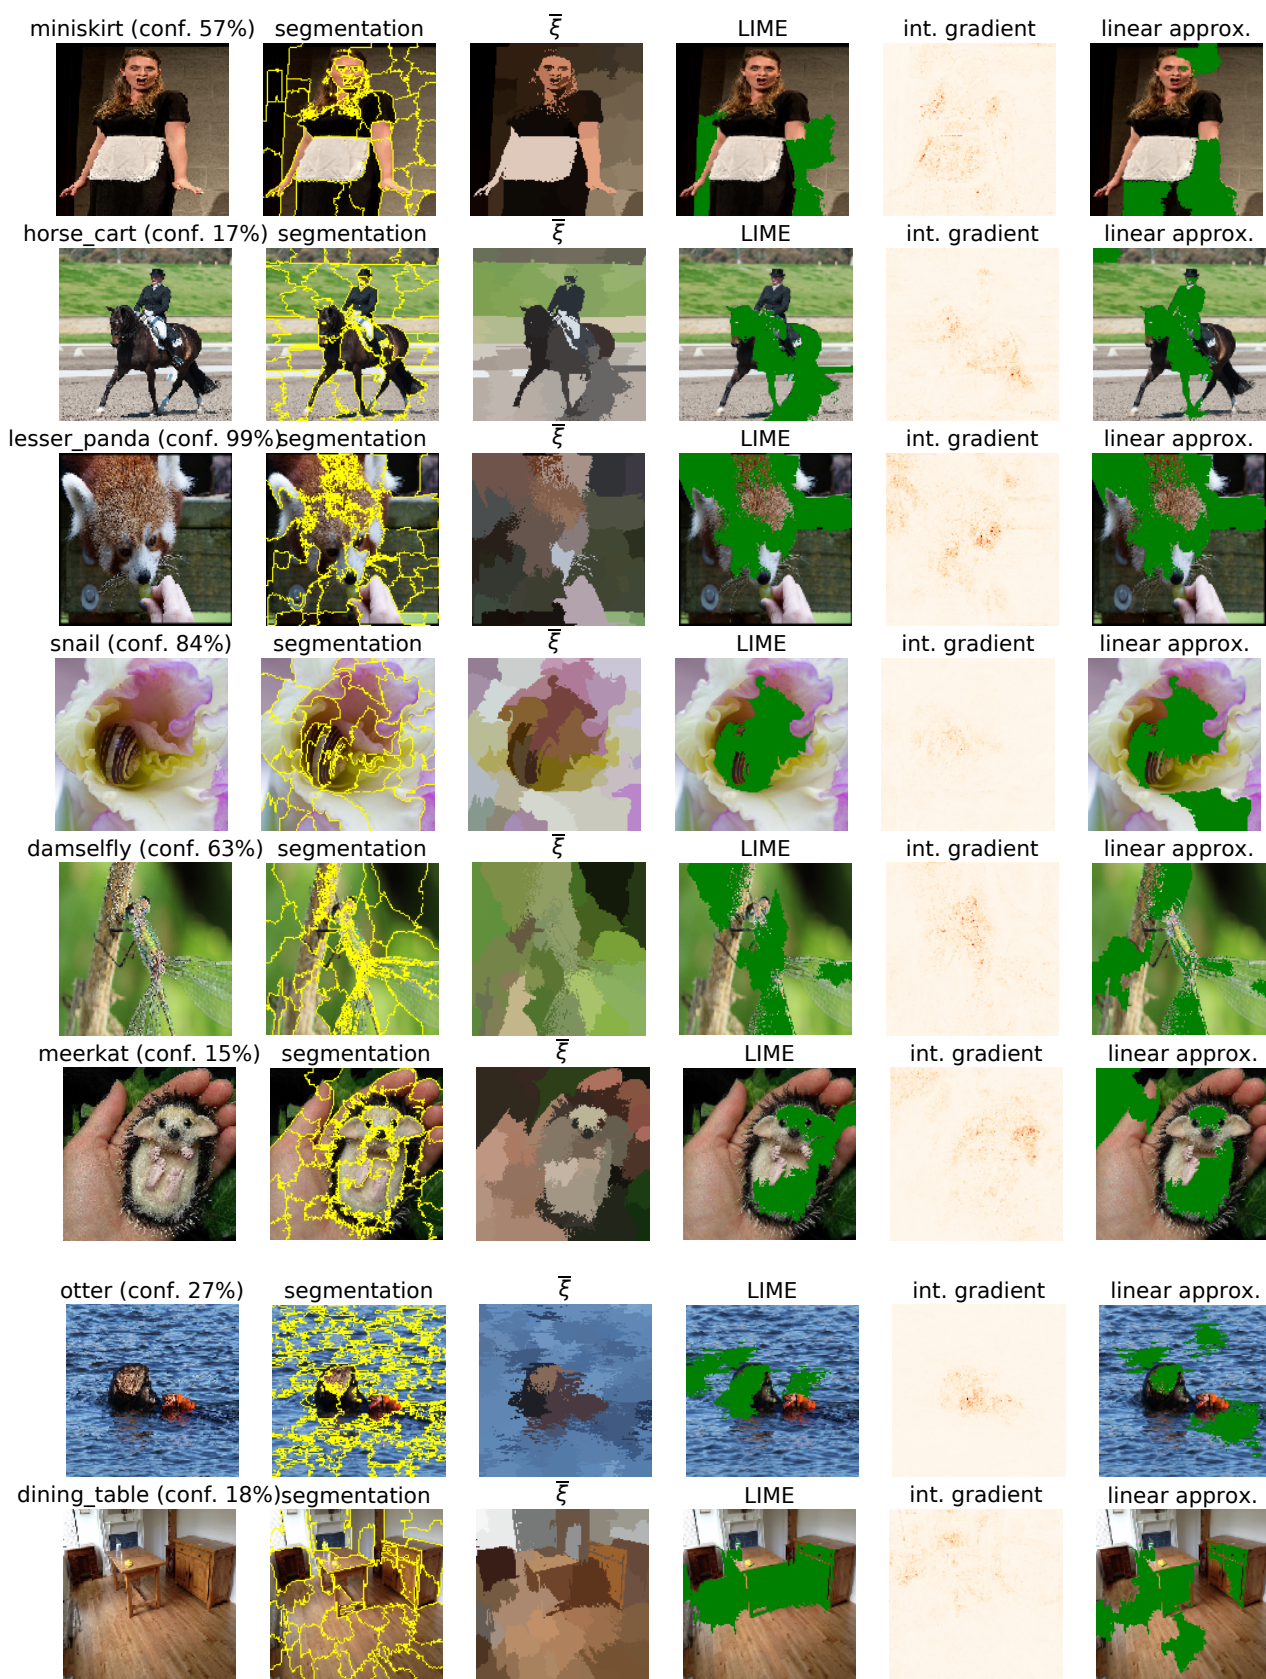

Figure 6: Empirical explanations, integrated gradient, and approximated explanations for images from the ILSVRC2017 dataset. The model explained is the likelihood function associated to the top class given by DenseNet121.

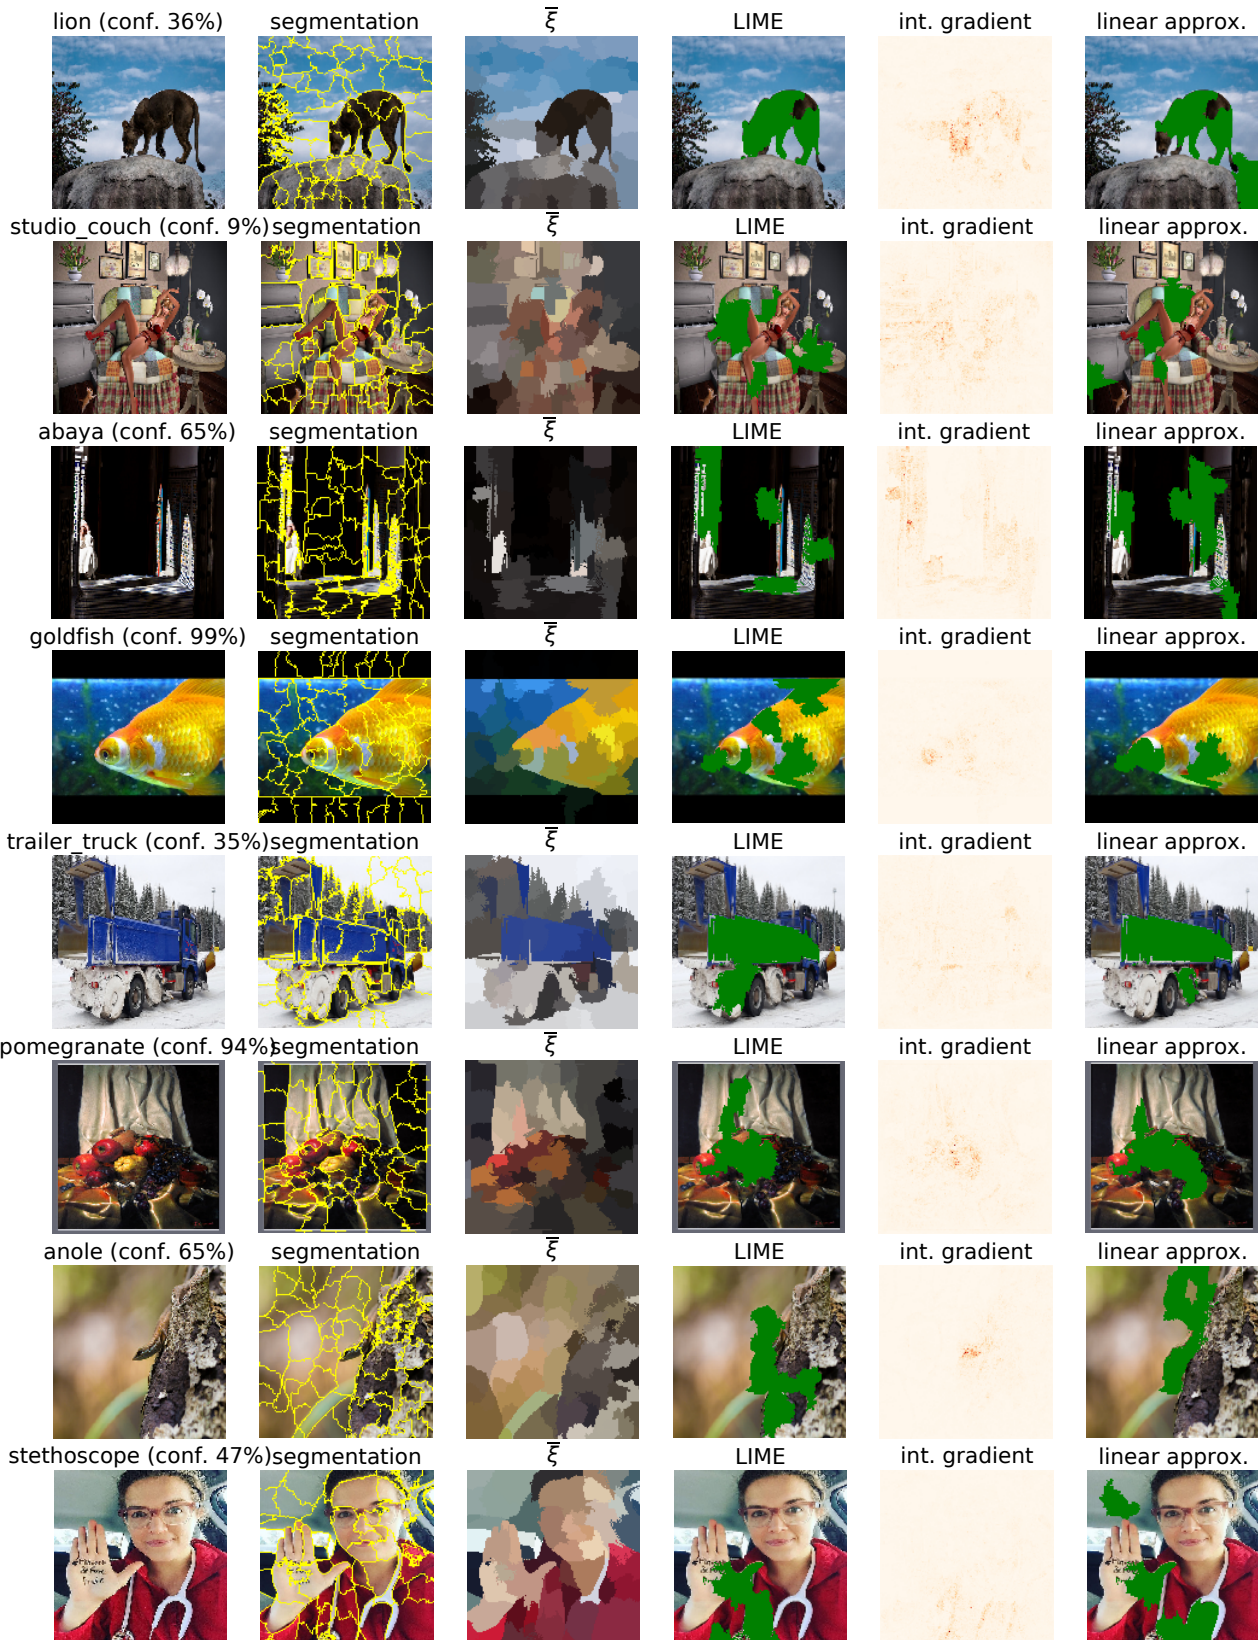

Figure 7: Empirical explanations, integrated gradient, and approximated explanations for images from the ILSVRC2017 dataset. The model explained is the likelihood function associated to the top class given by InceptionV3.

## References

- D. Garreau and U. von Luxburg. Looking Deeper into Tabular LIME. *arXiv preprint arXiv:2008.11092*, 2020.
- G. Huang, Z. Liu, L. Van Der Maaten, and K. Q. Weinberger. Densely connected convolutional networks. In *Proceedings of the IEEE conference on computer vision and pattern recognition*, pages 4700–4708, 2017.
- D. Mardaoui and D. Garreau. An Analysis of LIME for Text Data. In *Proceedings of The 24th International Conference on Artificial Intelligence and Statistics (AISTATS)*, 2021.
- M. Sandler, A. Howard, M. Zhu, A. Zhmoginov, and L.-C. Chen. Mobilenetv2: Inverted residuals and linear bottlenecks. In *Proceedings of the IEEE conference on Computer Vision and Pattern Recognition (CVPR)*, pages 4510–4520, 2018.
- J. M. Steele. *The Cauchy-Schwarz master class: an introduction to the art of mathematical inequalities*. Cambridge University Press, 2004.
- C. Szegedy, V. Vanhoucke, S. Ioffe, J. Shlens, and Z. Wojna. Rethinking the inception architecture for computer vision. In *Proceedings of the IEEE conference on computer vision and pattern recognition*, pages 2818–2826, 2016.
